# Supplementary material
Source: PubMed Central journal article supplement (PMC4451949)
Supplement: NIHMS666247-supplement-2.pdf [file NIHMS666247-supplement-2.pdf]

**Table Antibody information**

| Antibody              | Catalog No. | Vendor            |
|-----------------------|-------------|-------------------|
| p19ARF                | ab26696     | abcam             |
| JNK                   | 554285      | BD                |
| TIM23                 | 611222      | BD                |
| Cyto C                | 556433      | BD                |
| P-p38                 | 4631        | cell signaling    |
| ERK-1/2               | 4695        | cell signaling    |
| P-ERK-1/2             | 4376        | cell signaling    |
| Beclin-1              | 3738        | cell signaling    |
| LC3                   | 4108        | cell signaling    |
| IL-1 $\beta$          | 12242       | cell signaling    |
| p62                   | P0067       | sigma             |
| $\beta$ -actin        | AC-15       | sigma             |
| hsp60                 | SAB4501464  | sigma             |
| ATP5 $\beta$          | HPA001520   | sigma             |
| Ter119                | 12-5921-83  | eBioscience       |
| CD71                  | 17-0711-82  | eBioscience       |
| ATG5                  | AP1812b     | abgent            |
| PINK1                 | BC100-494   | Novus Biologicals |
| HIF-1 $\alpha$        | 10006421    | cayman chemical   |
| Ub(K48)               | 05-1307     | millipore         |
| Caspase-1             | sc-514      | santa cruz        |
| I $\kappa$ B $\alpha$ | sc-371      | santa cruz        |
| p19ARF #2             | sc-32748    | santa cruz        |
| Tubulin               | sc-5286     | santa cruz        |
| LaminA/C              | sc-20681    | santa cruz        |
| Ub                    | sc-8017     | santa cruz        |
| Xpress                | sc-499      | santa cruz        |
| Tom20                 | sc-11415    | santa cruz        |
